# Supplementary material for: Oral Health-Related Quality of Life in Young Adults: A Survey of Russian Undergraduate Students
Source: Int J Environ Res Public Health. 2018 Apr 11;15(4):719. doi: 10.3390/ijerph15040719 (PMC5923761; doi:10.3390/ijerph15040719)
Supplement: Supplementary file 1 [file ijerph-15-00719-s001.pdf]

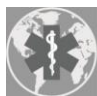

## Supplementary Materials

# Oral Health-Related Quality of Life in Young Adults: A Survey of Russian Undergraduate Students

Sergei N. Drachev, Tormod Brenn and Tordis A. Trovik

**Table S1.** The Russian version of Oral Health Impact Profile-14 (OHIP-14)\*

|                                                                                                                               | никогда | почти<br>никогда | иногда | достаточно<br>часто | очень<br>часто | не<br>знаю |
|-------------------------------------------------------------------------------------------------------------------------------|---------|------------------|--------|---------------------|----------------|------------|
| 1. Испытываете ли Вы затруднения при произношении слов из-за проблем с зубами, слизистой оболочкой полости рта или протезами? |         |                  |        |                     |                |            |
| 2. Вы потеряли вкус к пище из-за проблем с зубами, слизистой оболочкой полости рта или протезами?                             |         |                  |        |                     |                |            |
| 3. Испытываете ли Вы болевые ощущения в полости рта?                                                                          |         |                  |        |                     |                |            |
| 4. Вызывает ли у Вас затруднение прием пищи из-за проблем с зубами, слизистой оболочкой полости рта или протезами?            |         |                  |        |                     |                |            |
| 5. Чувствуете ли Вы себя стесненным в общении с людьми из-за проблем с зубами, слизистой оболочкой полости рта или протезами? |         |                  |        |                     |                |            |
| 6. Испытываете ли Вы неудобства из-за проблем с зубами, слизистой оболочкой полости рта или протезами?                        |         |                  |        |                     |                |            |
| 7. Пытаетесь ли Вы неудовлетворительно из-за проблем с зубами, слизистой оболочкой полости рта или протезами?                 |         |                  |        |                     |                |            |
| 8. Приходится ли Вам прерывать прием пищи из-за проблем с зубами, слизистой оболочкой полости рта или протезами?              |         |                  |        |                     |                |            |
| 9. Мешают ли Вам проблемы с зубами, слизистой оболочкой полости рта или протезами отдыхать, расслабляться?                    |         |                  |        |                     |                |            |

|                                                                                                                                           |  |  |  |  |  |  |
|-------------------------------------------------------------------------------------------------------------------------------------------|--|--|--|--|--|--|
| 10. Ставят ли Вас проблемы с зубами, слизистой оболочкой полости рта или протезами в неловкое положение?                                  |  |  |  |  |  |  |
| 11. Приводят ли Вас проблемы с зубами, слизистой оболочкой полости рта или протезами к повышенной раздражительности при общении с людьми? |  |  |  |  |  |  |
| 12. Испытываете ли Вы затруднения в обычной работе из-за проблем с зубами, слизистой оболочкой полости рта или протезами?                 |  |  |  |  |  |  |
| 13. Становится ли Ваша жизнь менее интересной из-за проблем с зубами, слизистой оболочкой полости рта или протезами?                      |  |  |  |  |  |  |
| 14. Приходится ли Вам полностью «выпадать из жизни» из-за проблем с зубами, слизистой оболочкой полости рта или протезами?                |  |  |  |  |  |  |

\* the items were taken from the paper Barer, G.M.; Gurevich, K.G.; Smirniagina, V.V.; Fabrikant, E.G. Validation of oral health impact profile (OHIP) quality of life questionnaire in Russian patients with evidence of chronic generalized periodontitis. *Stomatologiya (Mosk)* **2007**, *86*, 27-30. (In Russian).
